# Supplementary material for: The presence of CLL-associated stereotypic B cell receptors in the normal BCR repertoire from healthy individuals increases with age
Source: Springer Nature journal article supplement (doi:10.1186/s12979-019-0163-x), 2019-08-28

Supplementary Figure 2

A

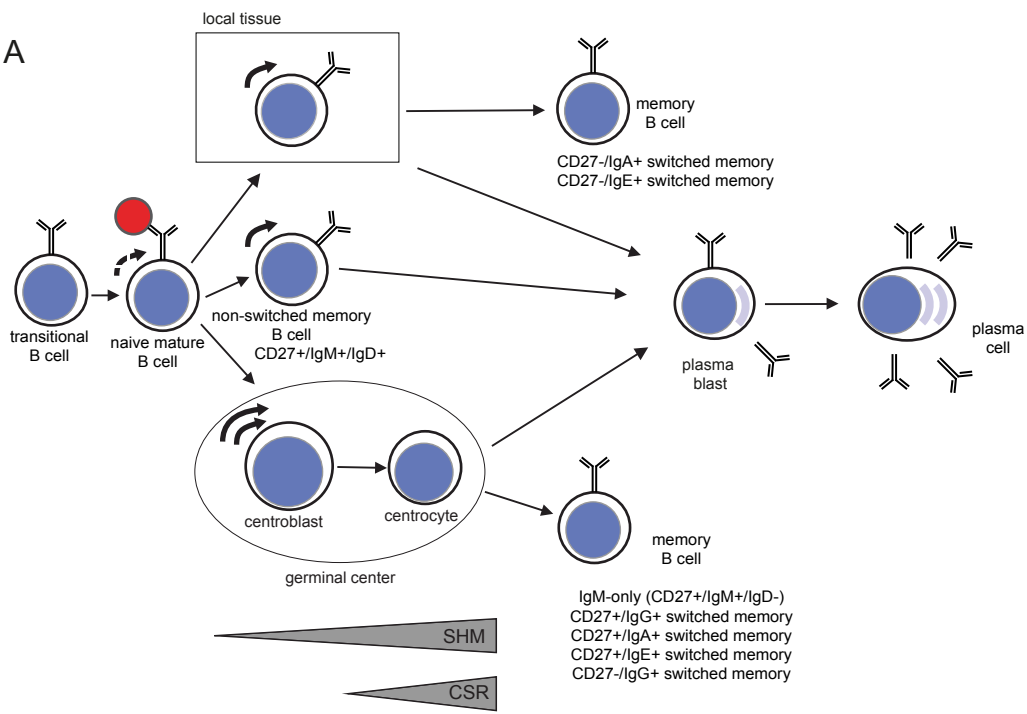

Supplement: MOESM2 [file 17111820]
