# Supplementary material for: The presence of CLL-associated stereotypic B cell receptors in the normal BCR repertoire from healthy individuals increases with age
Source: Springer Nature journal article supplement (doi:10.1186/s12979-019-0163-x), 2019-08-28

# Supplementary Figure 5

## A IgM-only

<50

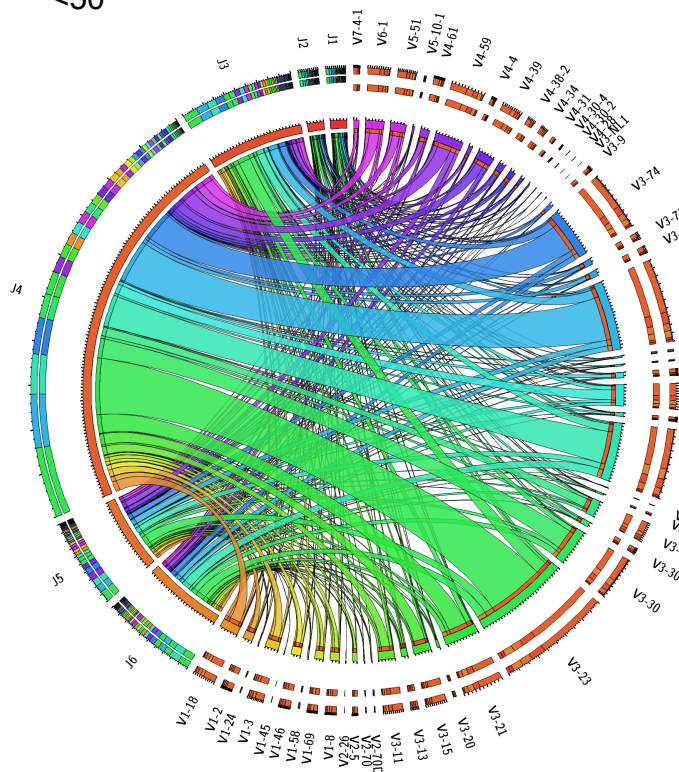

50-70

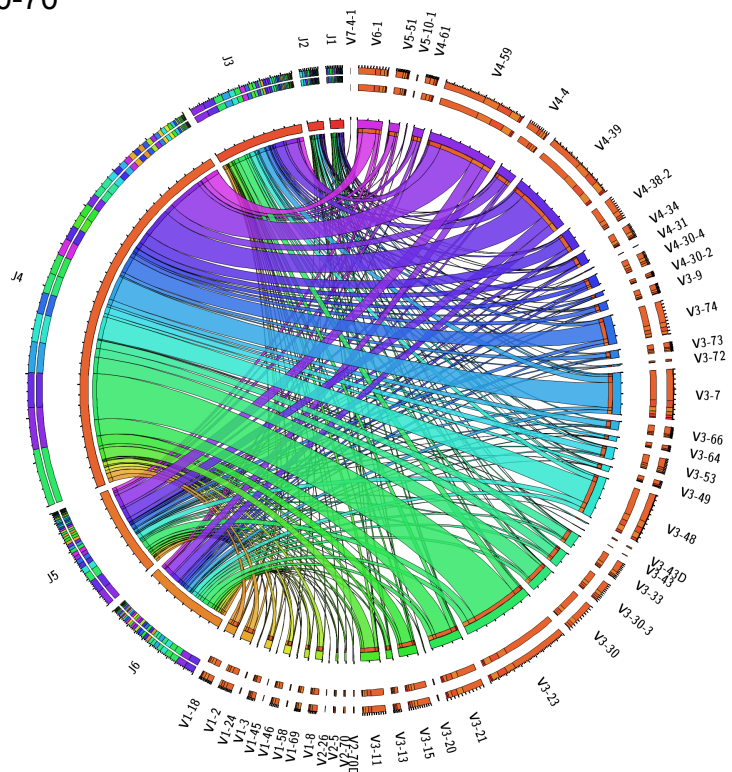

B non-switched memory

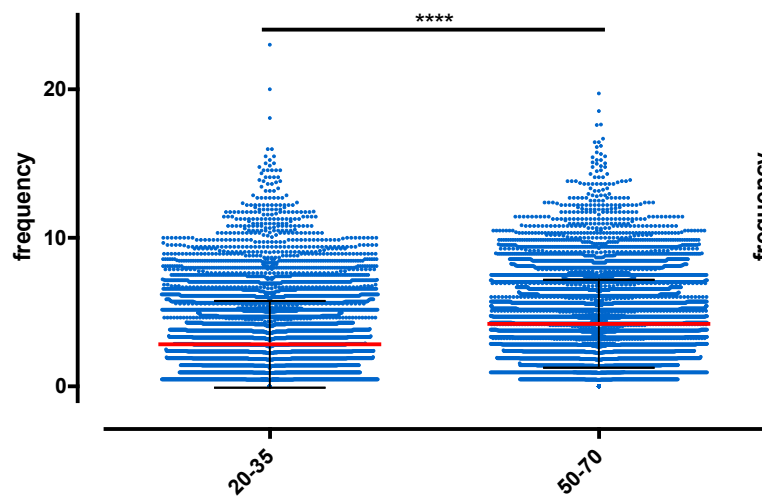

C IgM-only

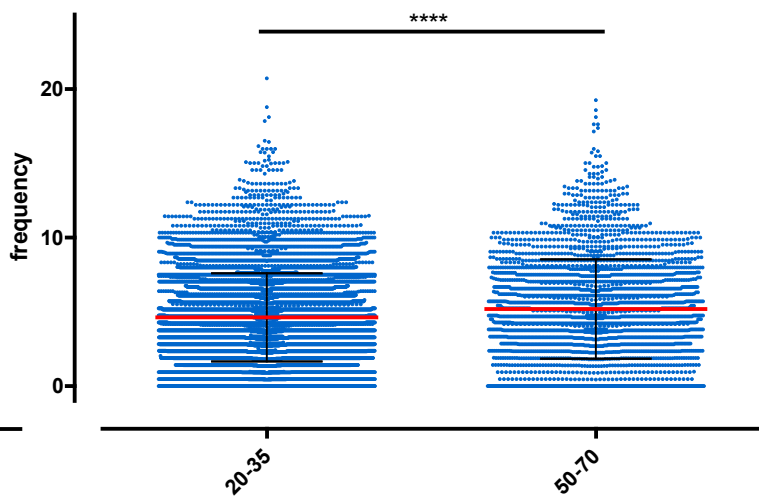

D CD27+IgG+ switched memory

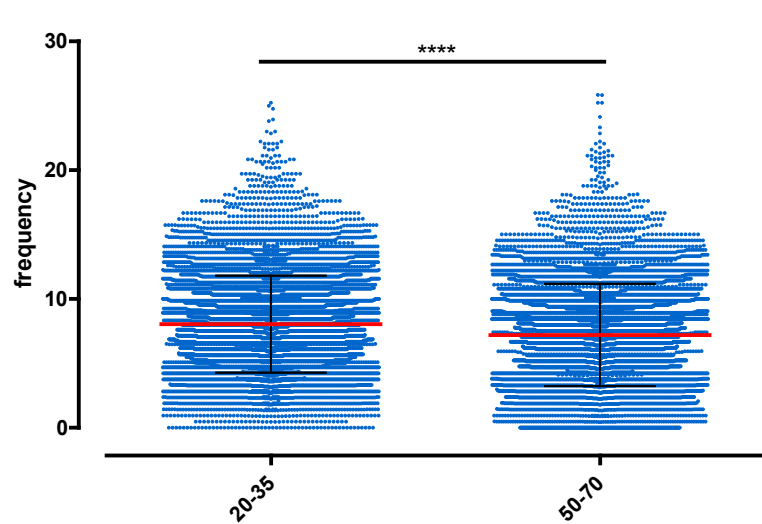

Supplement: MOESM5 [file 17111820]
